# Supplementary material
Source: PubMed Central journal article supplement (PMC8678954)
Supplement: NIHMS1650526-supplement-Supplemental_Publication_Material.pdf [file NIHMS1650526-supplement-Supplemental_Publication_Material.pdf]

**Online Supplement**

**Mechanistic Target of Rapamycin Complex 1 (mTORC1) Signaling in  
Endothelial and Smooth Muscle Cells is Required for Vascular  
Function**

John J. Reho<sup>1</sup>, Deng-Fu Guo<sup>1,5</sup>, Donald A. Morgan<sup>1,5</sup> and Kamal Rahmouni<sup>1,2,3,4,5\*</sup>

Department of Neuroscience and Pharmacology<sup>1</sup>, Department of Internal Medicine<sup>2</sup>,  
Obesity Education and Research Initiative<sup>3</sup> and Fraternal Order of Eagles Diabetes  
Research Center<sup>4</sup>, University of Iowa Carver College of Medicine and <sup>5</sup>Veterans Affairs  
Health Care System, Iowa City, Iowa

**Short title:** mTORC1 is Required for Vascular Function.

**Number of supplemental figures:** 6

**\*Corresponding author:**

Kamal Rahmouni, Ph.D.  
Department of Neuroscience and Pharmacology  
University of Iowa Carver College of Medicine  
Iowa City, IA, 52242, USA  
e-mail: kamal-rahmouni@uiowa.edu  
Tel: 319 353 5256  
Fax: 319 353 5350

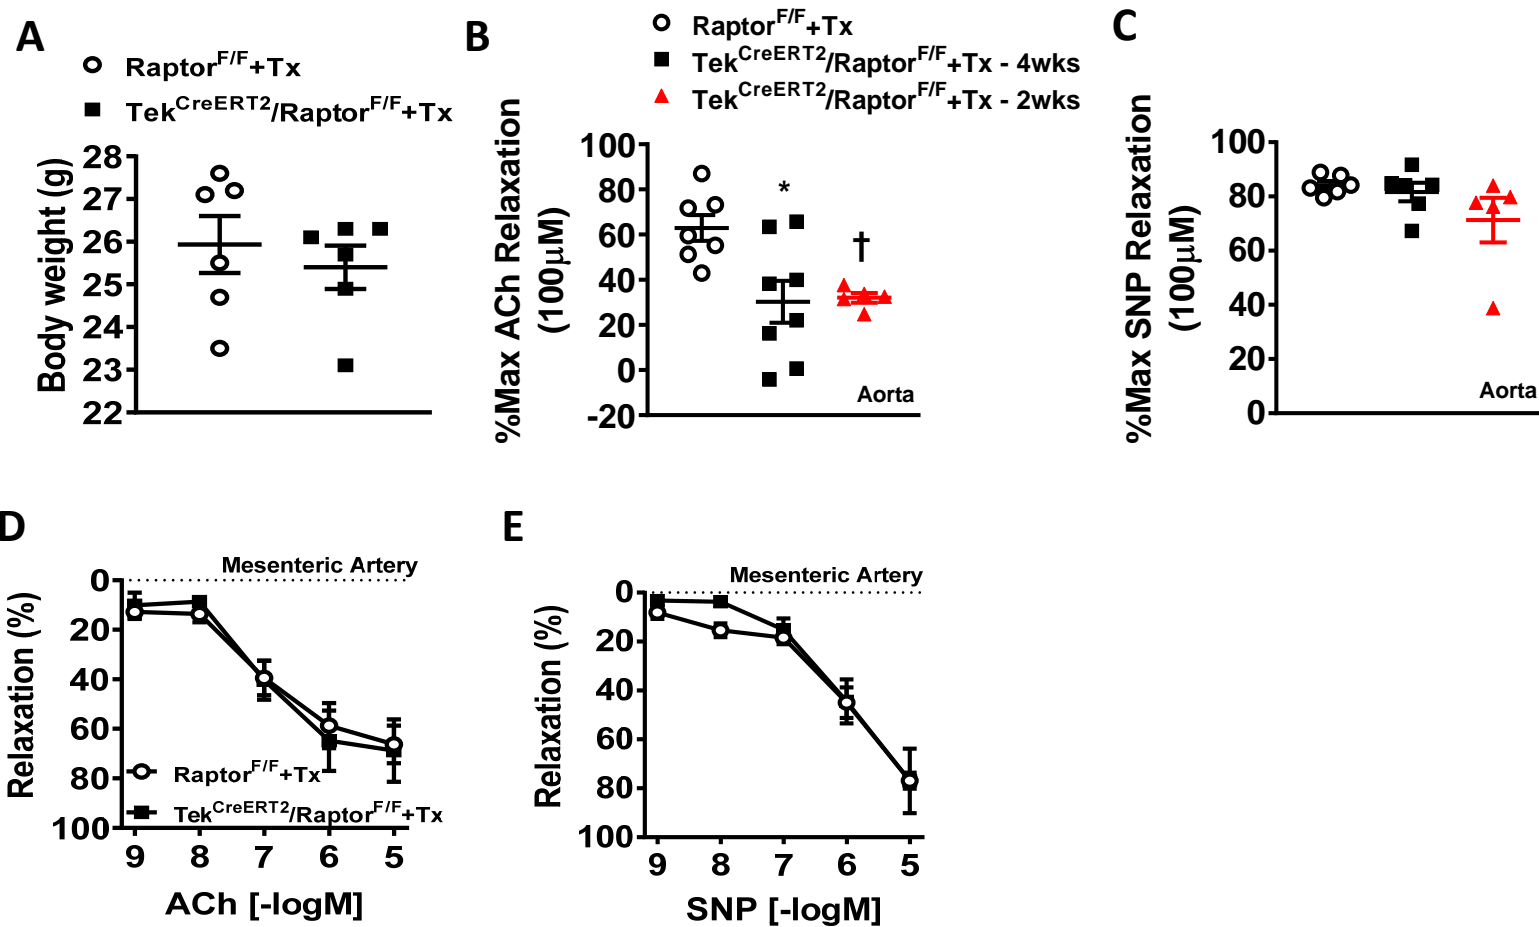

**Figure S1 – Effects of conditional endothelial-specific Raptor deletion on body weight and vascular function.** (A) Body weights of Tek<sup>CreERT2</sup>/Raptor<sup>F/F</sup> and control male mice measured 4-week post-tamoxifen. (B-C) Aortic ring relaxation responses to ACh (acetylcholine; B) and SNP (sodium nitroprusside; C) of Tek<sup>CreERT2</sup>/Raptor<sup>F/F</sup> and control male mice 2- and 4-week post-tamoxifen treatment. (D-E) Mesenteric artery relaxation responses to ACh (D) and SNP (E) of Tek<sup>CreERT2</sup>/Raptor<sup>F/F</sup> and control male mice post-Tamoxifen treatment. n=7-8/group; \* and †p<0.05 vs Raptor<sup>F/F</sup>+Tx via one-way ANOVA.

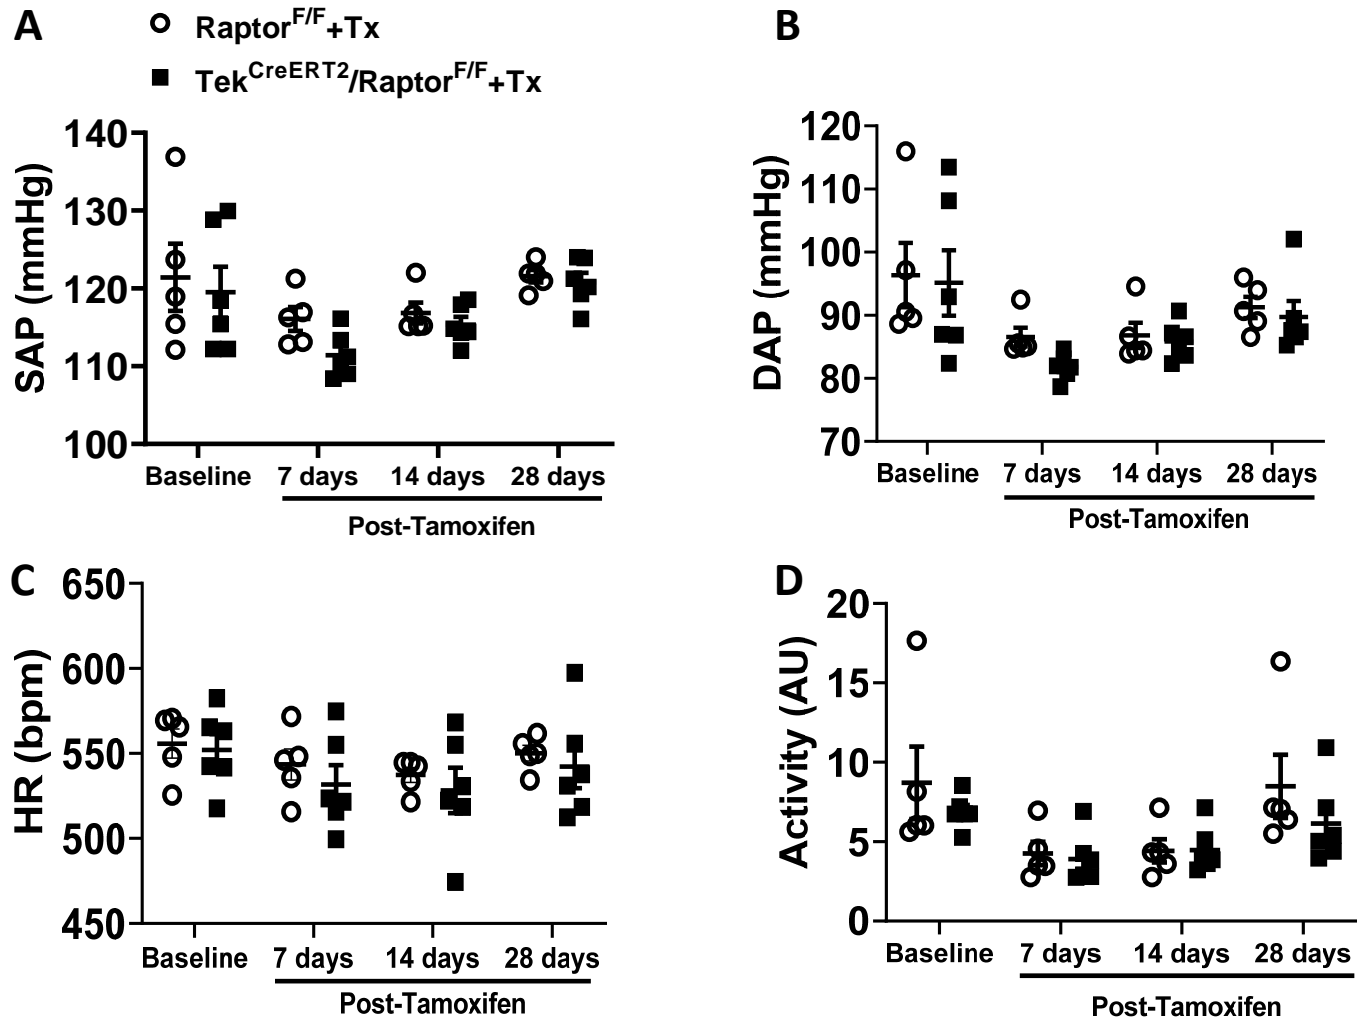

**Figure S2 – Effects of conditional endothelial-specific Raptor deletion on hemodynamic parameters and activity.** (A-D) Systolic (SAP, A), diastolic (DAP, B) blood pressure, heart rate (HR, C) and motor activity (D) of Tek<sup>CreERT2</sup>/Raptor<sup>F/F</sup> and Raptor<sup>F/F</sup> control male mice at baseline and at different time points after tamoxifen treatment.

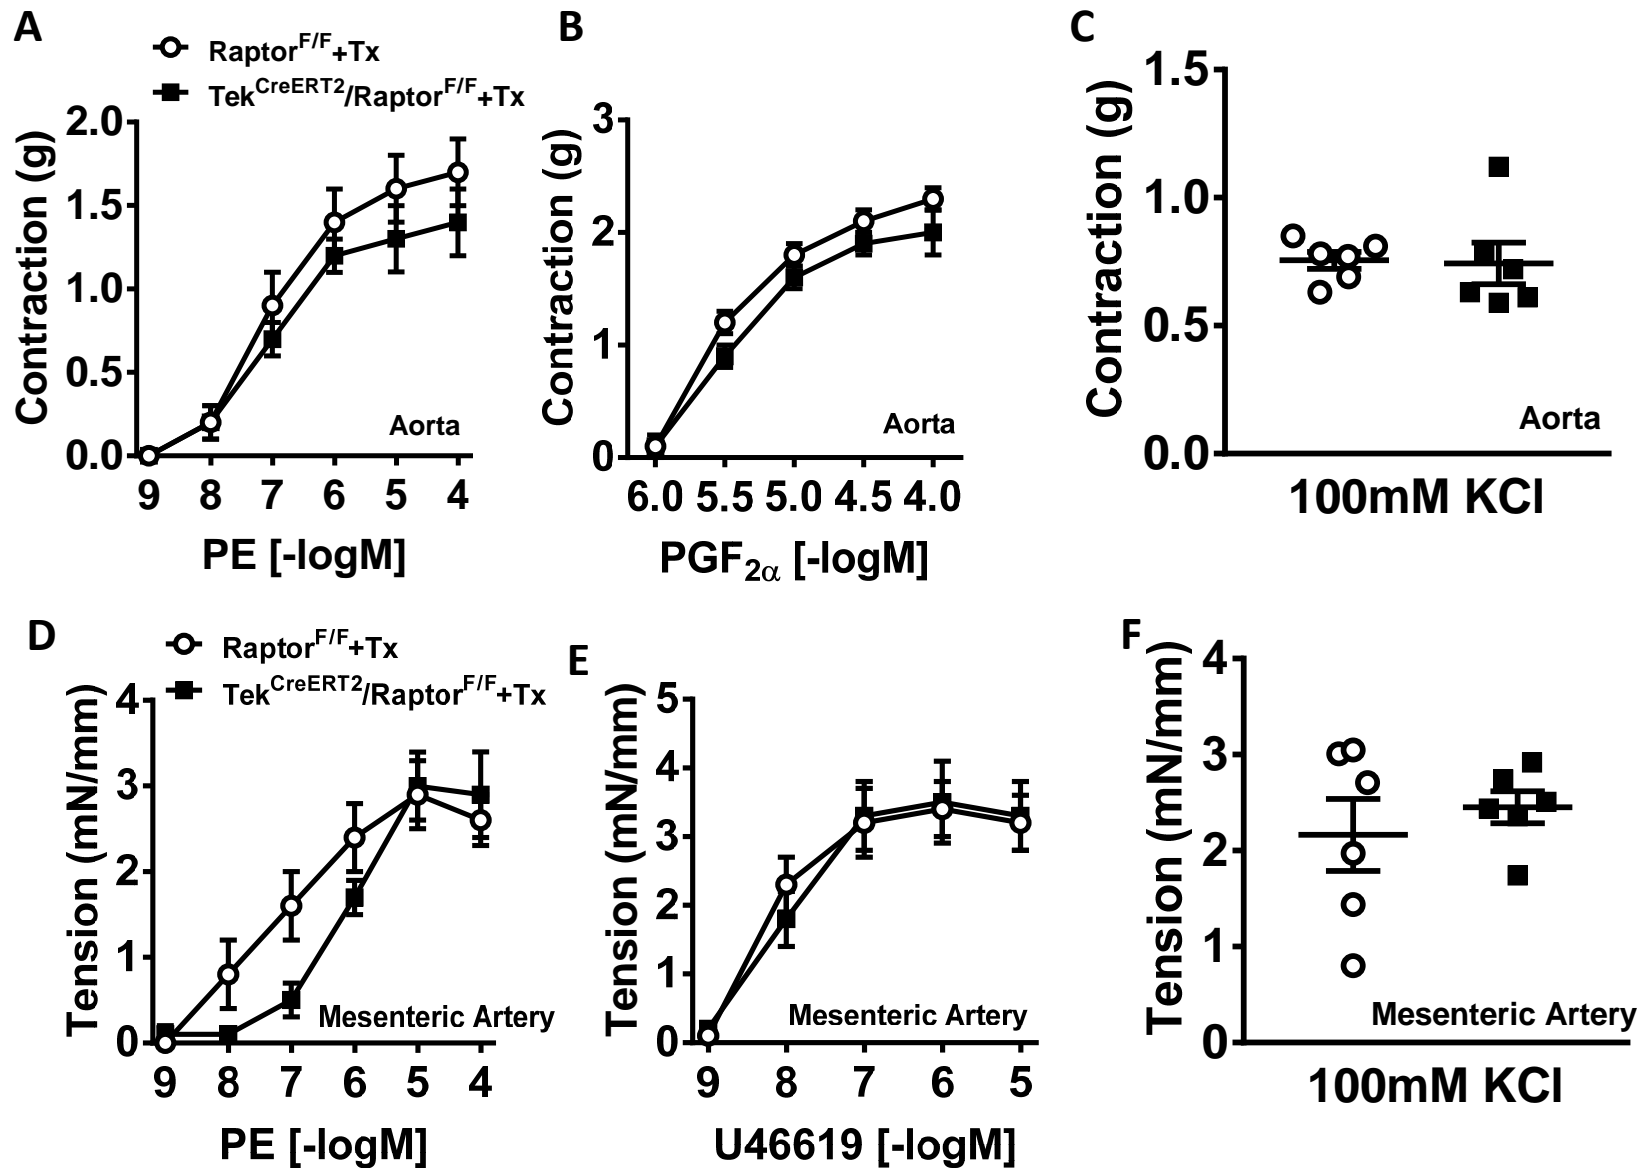

**Figure S3 – Conditional endothelial-specific Raptor deletion does not alter contractile function in aortic and mesenteric arterial rings.** Contractile responses evoked by PE (phenylephrine; **A,D**), PGF<sub>2α</sub> (**B**), U46619 (**E**), and 100mM KCl (**C,F**) in aortic and mesenteric arterial ring of tamoxifen-treated Tek<sup>CreERT2</sup>/Raptor<sup>F/F</sup> and control male mice. n=6/group.

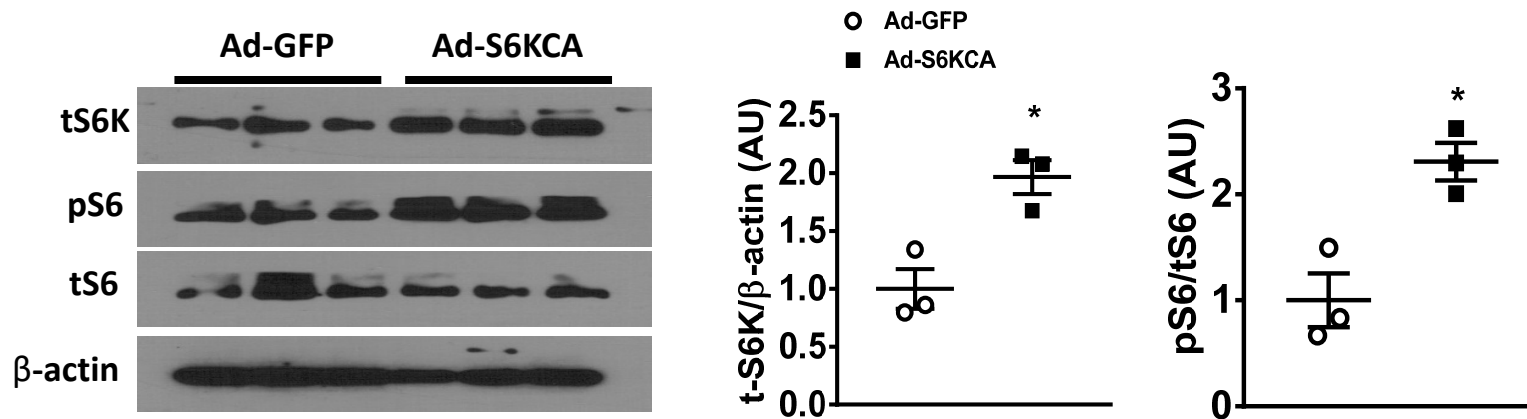

**Figure S4 – Validation of adenoviral-mediated restoration of mTORC1 signaling in aortic rings of conditional endothelial specific Raptor deleted mice.** Representative western blot images and quantification of tS6K (total S6K), pS6 (phospho-S6) tS6 (total S6) relative to β-actin in aortic lysates from tamoxifen treated endothelial-specific conditional Raptor knockout (Tek<sup>CreERT2</sup>/Raptor<sup>F/F</sup>) male mice at 4 weeks post-tamoxifen and cultured for 24hrs with Ad-GFP or Ad-S6KCA. \*p<0.05 via unpaired t-test.

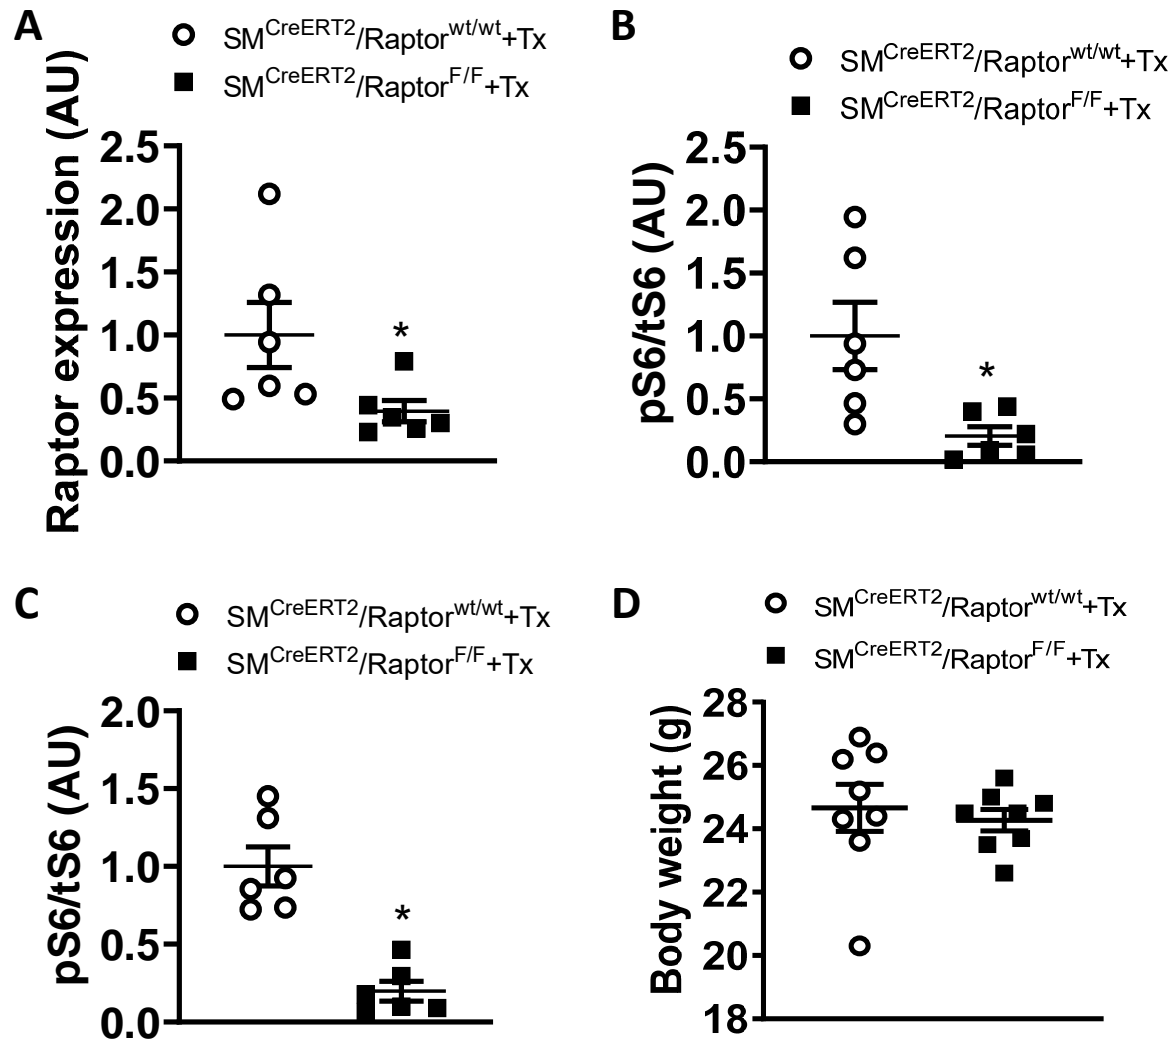

**Figure S5 – Smooth muscle-specific deletion of Raptor decrease mesenteric Raptor expression and inhibit mTORC1 signaling without altering body weight.** (A-B) Reduced Raptor protein expression (A) and phosphorylated levels of S6 protein (B) in the mesenteric artery of tamoxifen-treated SM<sup>CreERT2</sup>/Raptor<sup>F/F</sup> male mice. (C) Reduced phospho-S6 levels in the aorta of tamoxifen-treated SM<sup>CreERT2</sup>/Raptor<sup>F/F</sup> male mice. (D) Normal body weight, measured 4-week post-tamoxifen, of SM<sup>CreERT2</sup>/Raptor<sup>F/F</sup> mice relative to controls. \*p<0.05 via unpaired t-test.

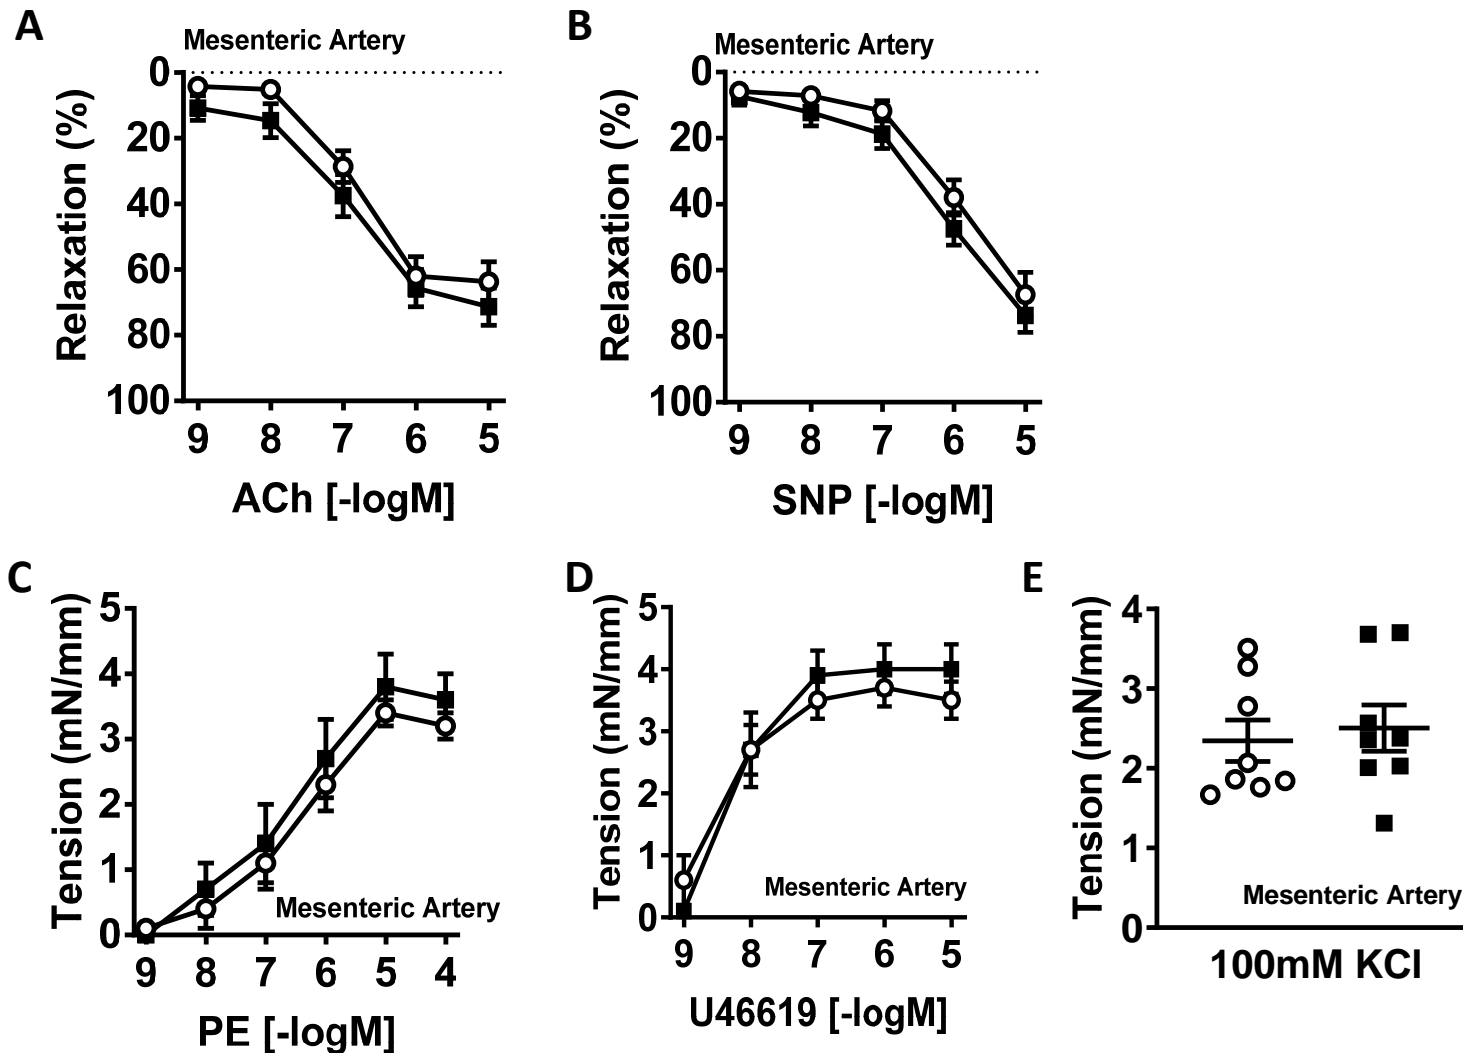

**Figure S6 – Smooth muscle-specific deletion of Raptor does not alter mesenteric vascular function.** (A-B) Relaxation responses to ACh (acetylcholine, A) and SNP (sodium nitroprusside, B) of mesenteric artery from SM<sup>CreERT2</sup>/Raptor<sup>F/F</sup> and control male mice post-tamoxifen treatment (n=8/group). (C-E) Contractile responses to PE (phenylephrine, C), U46619 (D) and KCl (E) in mesenteric arterial rings isolated from tamoxifen treated SM<sup>CreERT2</sup>/Raptor<sup>F/F</sup> mice and controls. n=8/group.

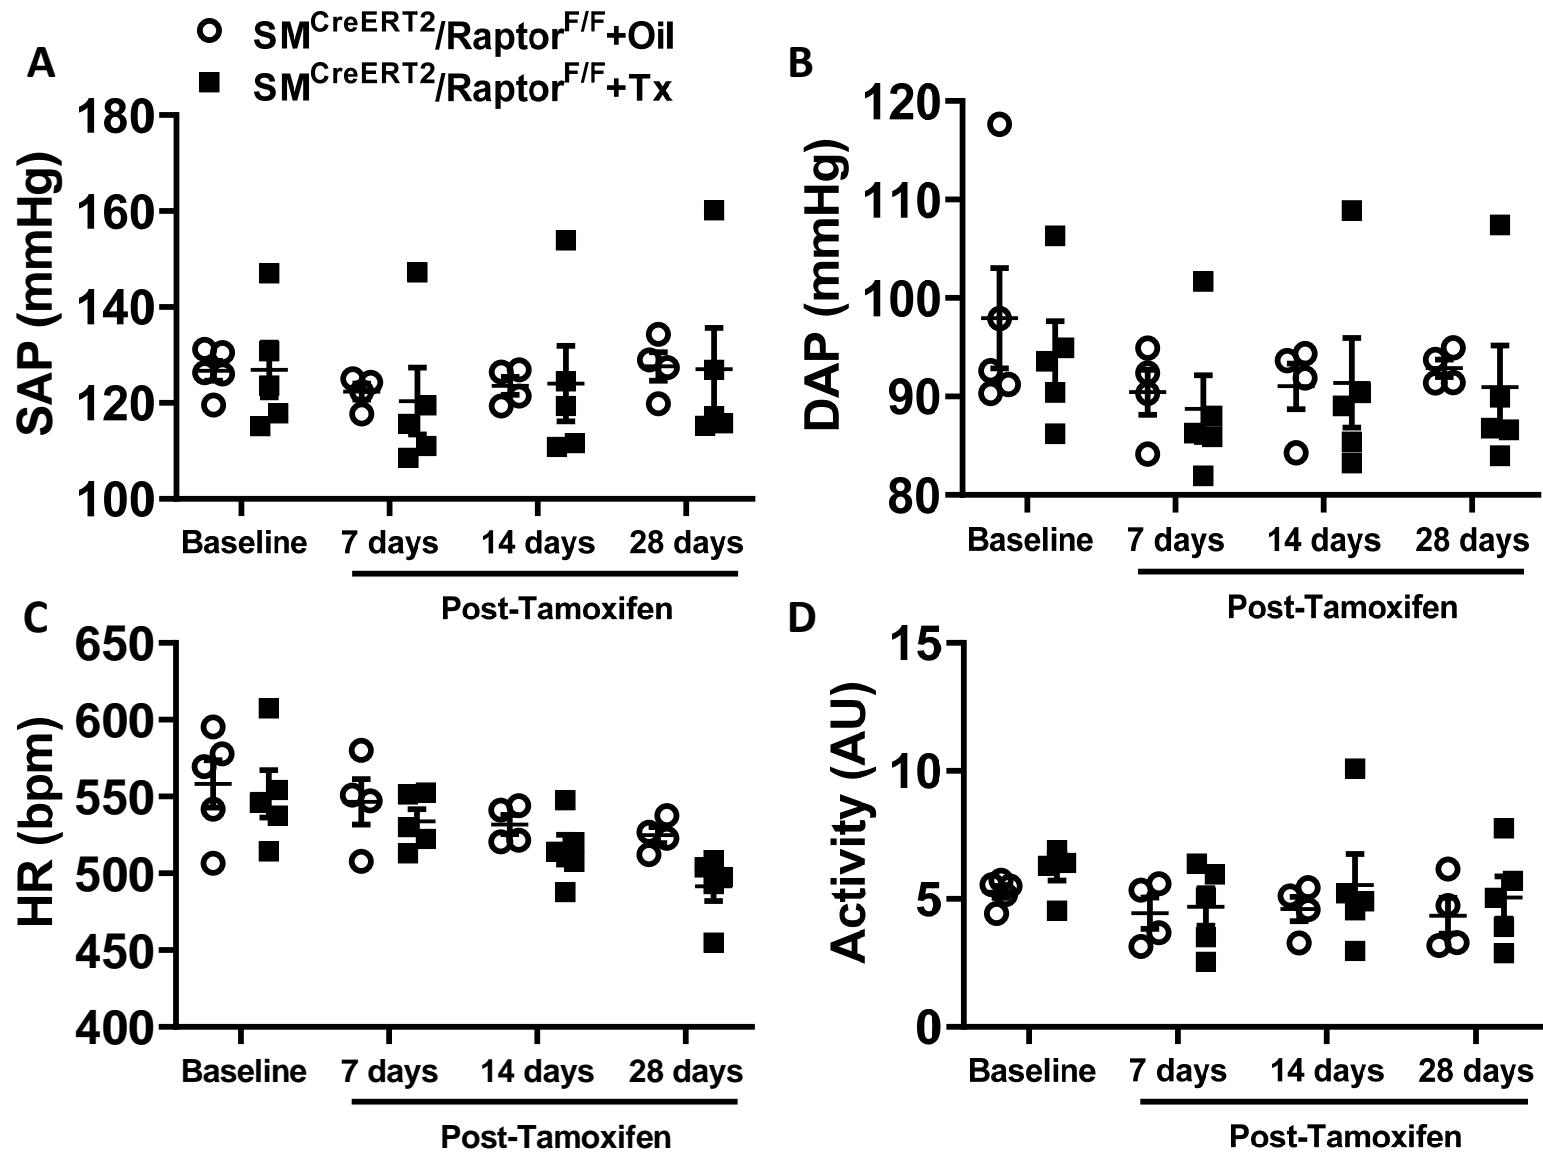

**Figure S7 – Effects of conditional smooth muscle-specific Raptor deletion on hemodynamic parameters and activity. (A-D)** Systolic (SAP, A), diastolic (DAP, B) blood pressure, heart rate (HR, C) and motor activity (D) of SM<sup>CreERT2</sup>/Raptor<sup>F/F</sup> male mice at baseline and at different time points after tamoxifen or vehicle (oil) treatments.
